# Supplementary material
Source: PubMed Central journal article supplement (PMC4145671)

| TYPE OF FOOD | HOW OFTEN IN THE PAST YEAR |                               |                      |                              |                     |                      |                             |                             |              | HOW MUCH EACH TIME<br>SEE PORTION SIZE PICTURES FOR A-B-C-D |  |  |  |
|--------------|----------------------------|-------------------------------|----------------------|------------------------------|---------------------|----------------------|-----------------------------|-----------------------------|--------------|-------------------------------------------------------------|--|--|--|
|              | NEVER                      | A FEW<br>TIMES<br>per<br>YEAR | ONCE<br>per<br>MONTH | 2-3<br>TIMES<br>per<br>MONTH | ONCE<br>per<br>WEEK | TWICE<br>per<br>WEEK | 3-4<br>TIMES<br>per<br>WEEK | 5-6<br>TIMES<br>per<br>WEEK | EVERY<br>DAY |                                                             |  |  |  |

**How often do you eat each of the following foods all year round?**

|                                                                     |                       |                       |                       |                       |                       |                       |                       |                       |                       |                         |                         |                         |                         |                         |
|---------------------------------------------------------------------|-----------------------|-----------------------|-----------------------|-----------------------|-----------------------|-----------------------|-----------------------|-----------------------|-----------------------|-------------------------|-------------------------|-------------------------|-------------------------|-------------------------|
| Eggs, including egg biscuits or Egg McMuffins (Not egg substitutes) | <input type="radio"/> | How many eggs each time | <input type="radio"/> 1 | <input type="radio"/> 2 | <input type="radio"/> 3 | <input type="radio"/> 4 |
| Bacon or breakfast sausage, including sausage biscuit               | <input type="radio"/> | How many pieces         | <input type="radio"/> 1 | <input type="radio"/> 2 | <input type="radio"/> 3 | <input type="radio"/> 4 |
| Cooked cereals like oatmeal, cream of wheat or grits                | <input type="radio"/> | Which bowl              |                         | <input type="radio"/> B | <input type="radio"/> C | <input type="radio"/> D |
| Cold cereals like Corn Flakes, Cheerios, Special K, fiber cereals   | <input type="radio"/> | Which bowl              |                         | <input type="radio"/> B | <input type="radio"/> C | <input type="radio"/> D |

Which cereal do you eat most often? **MARK ONLY ONE:**  Bran Buds, Raisin Bran, Fruit-n-Fiber, other fiber cereals  
 Product 19, Just Right, Total  Other cold cereal, like Corn Flakes, Cheerios, Special K

|                                                                  |                       |                       |                       |                       |                       |                       |                       |                       |                       |                 |                         |                         |                         |                         |
|------------------------------------------------------------------|-----------------------|-----------------------|-----------------------|-----------------------|-----------------------|-----------------------|-----------------------|-----------------------|-----------------------|-----------------|-------------------------|-------------------------|-------------------------|-------------------------|
| Cheese, sliced cheese or cheese spread, including on sandwiches. | <input type="radio"/> | How many slices | <input type="radio"/> 1 | <input type="radio"/> 2 | <input type="radio"/> 3 | <input type="radio"/> 4 |
| Yogurt (not frozen yogurt)                                       | <input type="radio"/> | How much        | <input type="radio"/> A | <input type="radio"/> B | <input type="radio"/> C | <input type="radio"/> D |

**How often do you eat each of the following fruits?**

|                                                            |                       |                       |                       |                       |                       |                       |                       |                       |                       |                    |                           |                         |                         |                         |
|------------------------------------------------------------|-----------------------|-----------------------|-----------------------|-----------------------|-----------------------|-----------------------|-----------------------|-----------------------|-----------------------|--------------------|---------------------------|-------------------------|-------------------------|-------------------------|
| Bananas                                                    | <input type="radio"/> | How many each time | <input type="radio"/> 1/2 | <input type="radio"/> 1 | <input type="radio"/> 2 | <input type="radio"/> 3 |
| Apples or pears                                            | <input type="radio"/> | How many           | <input type="radio"/> 1/2 | <input type="radio"/> 1 | <input type="radio"/> 2 | <input type="radio"/> 3 |
| Oranges, tangerines, not including juice                   | <input type="radio"/> | How many           | <input type="radio"/> 1/2 | <input type="radio"/> 1 | <input type="radio"/> 2 | <input type="radio"/> 3 |
| Applesauce, fruit cocktail, or any canned fruit            | <input type="radio"/> | How much           | <input type="radio"/> A   | <input type="radio"/> B | <input type="radio"/> C | <input type="radio"/> D |
| Any other fruit, like grapes, melon, strawberries, peaches | <input type="radio"/> | How much           | <input type="radio"/> A   | <input type="radio"/> B | <input type="radio"/> C | <input type="radio"/> D |

Copyright Block Dietary Data Systems  
Berkeley, CA

| TYPE OF FOOD                                                                      | HOW OFTEN IN THE PAST YEAR |                               |                       |                              |                       |                       |                             |                             | HOW MUCH EACH TIME<br>SEE PORTION SIZE PICTURES FOR A-B-C-D |                |                           |                           |                         |                         |
|-----------------------------------------------------------------------------------|----------------------------|-------------------------------|-----------------------|------------------------------|-----------------------|-----------------------|-----------------------------|-----------------------------|-------------------------------------------------------------|----------------|---------------------------|---------------------------|-------------------------|-------------------------|
|                                                                                   | NEVER                      | A FEW<br>TIMES<br>per<br>YEAR | ONCE<br>per<br>MONTH  | 2-3<br>TIMES<br>per<br>MONTH | ONCE<br>per<br>WEEK   | TWICE<br>per<br>WEEK  | 3-4<br>TIMES<br>per<br>WEEK | 5-6<br>TIMES<br>per<br>WEEK | EVERY<br>DAY                                                |                |                           |                           |                         |                         |
| French fries, fried potatoes or hash browns                                       | <input type="radio"/>      | <input type="radio"/>         | <input type="radio"/> | <input type="radio"/>        | <input type="radio"/> | <input type="radio"/> | <input type="radio"/>       | <input type="radio"/>       | <input type="radio"/>                                       | How much       | <input type="radio"/> A   | <input type="radio"/> B   | <input type="radio"/> C | <input type="radio"/> D |
| White potatoes not fried, incl. boiled, baked, mashed & potato salad              | <input type="radio"/>      | <input type="radio"/>         | <input type="radio"/> | <input type="radio"/>        | <input type="radio"/> | <input type="radio"/> | <input type="radio"/>       | <input type="radio"/>       | <input type="radio"/>                                       | How much       | <input type="radio"/> A   | <input type="radio"/> B   | <input type="radio"/> C | <input type="radio"/> D |
| Sweet potatoes, yams, or sweet potato pie                                         | <input type="radio"/>      | <input type="radio"/>         | <input type="radio"/> | <input type="radio"/>        | <input type="radio"/> | <input type="radio"/> | <input type="radio"/>       | <input type="radio"/>       | <input type="radio"/>                                       | How much       | <input type="radio"/> A   | <input type="radio"/> B   | <input type="radio"/> C | <input type="radio"/> D |
| Rice, or dishes made with rice                                                    | <input type="radio"/>      | <input type="radio"/>         | <input type="radio"/> | <input type="radio"/>        | <input type="radio"/> | <input type="radio"/> | <input type="radio"/>       | <input type="radio"/>       | <input type="radio"/>                                       | How much       | <input type="radio"/> A   | <input type="radio"/> B   | <input type="radio"/> C | <input type="radio"/> D |
| Baked beans, chili with beans, pintos, any other dried beans                      | <input type="radio"/>      | <input type="radio"/>         | <input type="radio"/> | <input type="radio"/>        | <input type="radio"/> | <input type="radio"/> | <input type="radio"/>       | <input type="radio"/>       | <input type="radio"/>                                       | How much       | <input type="radio"/> A   | <input type="radio"/> B   | <input type="radio"/> C | <input type="radio"/> D |
| Refried beans                                                                     | <input type="radio"/>      | <input type="radio"/>         | <input type="radio"/> | <input type="radio"/>        | <input type="radio"/> | <input type="radio"/> | <input type="radio"/>       | <input type="radio"/>       | <input type="radio"/>                                       | How much       | <input type="radio"/> A   | <input type="radio"/> B   | <input type="radio"/> C | <input type="radio"/> D |
| Green beans or green peas                                                         | <input type="radio"/>      | <input type="radio"/>         | <input type="radio"/> | <input type="radio"/>        | <input type="radio"/> | <input type="radio"/> | <input type="radio"/>       | <input type="radio"/>       | <input type="radio"/>                                       | How much       | <input type="radio"/> A   | <input type="radio"/> B   | <input type="radio"/> C | <input type="radio"/> D |
| Broccoli                                                                          | <input type="radio"/>      | <input type="radio"/>         | <input type="radio"/> | <input type="radio"/>        | <input type="radio"/> | <input type="radio"/> | <input type="radio"/>       | <input type="radio"/>       | <input type="radio"/>                                       | How much       | <input type="radio"/> A   | <input type="radio"/> B   | <input type="radio"/> C | <input type="radio"/> D |
| Carrots, or stews or mixed vegetables containing carrots                          | <input type="radio"/>      | <input type="radio"/>         | <input type="radio"/> | <input type="radio"/>        | <input type="radio"/> | <input type="radio"/> | <input type="radio"/>       | <input type="radio"/>       | <input type="radio"/>                                       | How much       | <input type="radio"/> A   | <input type="radio"/> B   | <input type="radio"/> C | <input type="radio"/> D |
| Spinach, or greens like collards                                                  | <input type="radio"/>      | <input type="radio"/>         | <input type="radio"/> | <input type="radio"/>        | <input type="radio"/> | <input type="radio"/> | <input type="radio"/>       | <input type="radio"/>       | <input type="radio"/>                                       | How much       | <input type="radio"/> A   | <input type="radio"/> B   | <input type="radio"/> C | <input type="radio"/> D |
| Cole slaw, cabbage                                                                | <input type="radio"/>      | <input type="radio"/>         | <input type="radio"/> | <input type="radio"/>        | <input type="radio"/> | <input type="radio"/> | <input type="radio"/>       | <input type="radio"/>       | <input type="radio"/>                                       | How much       | <input type="radio"/> A   | <input type="radio"/> B   | <input type="radio"/> C | <input type="radio"/> D |
| Green salad                                                                       | <input type="radio"/>      | <input type="radio"/>         | <input type="radio"/> | <input type="radio"/>        | <input type="radio"/> | <input type="radio"/> | <input type="radio"/>       | <input type="radio"/>       | <input type="radio"/>                                       | How much       | <input type="radio"/> A   | <input type="radio"/> B   | <input type="radio"/> C | <input type="radio"/> D |
| Raw tomatoes, including in salad                                                  | <input type="radio"/>      | <input type="radio"/>         | <input type="radio"/> | <input type="radio"/>        | <input type="radio"/> | <input type="radio"/> | <input type="radio"/>       | <input type="radio"/>       | <input type="radio"/>                                       | How much       | <input type="radio"/> 1/4 | <input type="radio"/> 1/2 | <input type="radio"/> 1 | <input type="radio"/> 2 |
| Catsup, salsa or chile peppers                                                    | <input type="radio"/>      | <input type="radio"/>         | <input type="radio"/> | <input type="radio"/>        | <input type="radio"/> | <input type="radio"/> | <input type="radio"/>       | <input type="radio"/>       | <input type="radio"/>                                       | How many TBSP. | <input type="radio"/> 1   | <input type="radio"/> 2   | <input type="radio"/> 3 | <input type="radio"/> 4 |
| Salad dressing or mayonnaise (Not lowfat)                                         | <input type="radio"/>      | <input type="radio"/>         | <input type="radio"/> | <input type="radio"/>        | <input type="radio"/> | <input type="radio"/> | <input type="radio"/>       | <input type="radio"/>       | <input type="radio"/>                                       | How many TBSP. | <input type="radio"/> 1   | <input type="radio"/> 2   | <input type="radio"/> 3 | <input type="radio"/> 4 |
| Any other vegetable, like corn, squash, okra, cooked green peppers, cooked onions | <input type="radio"/>      | <input type="radio"/>         | <input type="radio"/> | <input type="radio"/>        | <input type="radio"/> | <input type="radio"/> | <input type="radio"/>       | <input type="radio"/>       | <input type="radio"/>                                       | How much       | <input type="radio"/> A   | <input type="radio"/> B   | <input type="radio"/> C | <input type="radio"/> D |
| Vegetable soup, vegetable beef, chicken vegetable, or tomato soup                 | <input type="radio"/>      | <input type="radio"/>         | <input type="radio"/> | <input type="radio"/>        | <input type="radio"/> | <input type="radio"/> | <input type="radio"/>       | <input type="radio"/>       | <input type="radio"/>                                       | Which bowl     |                           | <input type="radio"/> B   | <input type="radio"/> C | <input type="radio"/> D |



PLEASE DO NOT WRITE IN THIS AREA

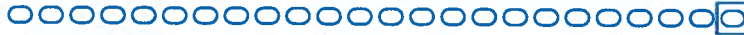

| TYPE OF FOOD | HOW OFTEN IN THE PAST YEAR |                               |                      |                              |                     |                      |                             |                             |              | HOW MUCH EACH TIME<br>SEE PORTION SIZE PICTURES FOR A-B-C-D |  |  |  |
|--------------|----------------------------|-------------------------------|----------------------|------------------------------|---------------------|----------------------|-----------------------------|-----------------------------|--------------|-------------------------------------------------------------|--|--|--|
|              | NEVER                      | A FEW<br>TIMES<br>per<br>YEAR | ONCE<br>per<br>MONTH | 2-3<br>TIMES<br>per<br>MONTH | ONCE<br>per<br>WEEK | TWICE<br>per<br>WEEK | 3-4<br>TIMES<br>per<br>WEEK | 5-6<br>TIMES<br>per<br>WEEK | EVERY<br>DAY |                                                             |  |  |  |

**MEATS**

Do you ever eat chicken, meat or fish?  Yes  No IF NO, SKIP TO NEXT PAGE

|                                                                    |                       |                       |                       |                       |                       |                       |                       |                       |                       |               |                       |                       |                       |                       |
|--------------------------------------------------------------------|-----------------------|-----------------------|-----------------------|-----------------------|-----------------------|-----------------------|-----------------------|-----------------------|-----------------------|---------------|-----------------------|-----------------------|-----------------------|-----------------------|
| Hamburgers, cheeseburgers, meat loaf, at home or in a restaurant   | <input type="radio"/> | How much meat | <input type="radio"/> | <input type="radio"/> | <input type="radio"/> | <input type="radio"/> |
| Tacos, burritos, enchiladas, tamales                               | <input type="radio"/> | How much      | <input type="radio"/> | <input type="radio"/> | <input type="radio"/> | <input type="radio"/> |
| Beef steaks, roasts, pot roast, or in frozen dinners or sandwiches | <input type="radio"/> | How much      | <input type="radio"/> | <input type="radio"/> | <input type="radio"/> | <input type="radio"/> |
| Pork, including chops, roasts, or dinner ham                       | <input type="radio"/> | How much      | <input type="radio"/> | <input type="radio"/> | <input type="radio"/> | <input type="radio"/> |

When you eat beef or pork, do you  Avoid eating the fat  Sometimes eat the fat  Often eat the fat  I don't eat meat

|                                                                                                         |                       |                       |                       |                       |                       |                       |                       |                       |                       |                 |                       |                       |                       |                       |
|---------------------------------------------------------------------------------------------------------|-----------------------|-----------------------|-----------------------|-----------------------|-----------------------|-----------------------|-----------------------|-----------------------|-----------------------|-----------------|-----------------------|-----------------------|-----------------------|-----------------------|
| Mixed dishes with meat or chicken, like stew, corned beef hash, chicken & dumplings, or in frozen meals | <input type="radio"/> | How much        | <input type="radio"/> | <input type="radio"/> | <input type="radio"/> | <input type="radio"/> |
| Fried chicken, at home or in a restaurant                                                               | <input type="radio"/> | # medium pieces | <input type="radio"/> | <input type="radio"/> | <input type="radio"/> | <input type="radio"/> |
| Chicken or turkey not fried, such as baked, grilled, or on sandwiches                                   | <input type="radio"/> | How much        | <input type="radio"/> | <input type="radio"/> | <input type="radio"/> | <input type="radio"/> |

When you eat chicken, do you  Avoid eating the skin  Sometimes eat the skin  Often eat the skin  N/A

|                                                              |                       |                       |                       |                       |                       |                       |                       |                       |                       |                 |                       |                       |                       |                       |
|--------------------------------------------------------------|-----------------------|-----------------------|-----------------------|-----------------------|-----------------------|-----------------------|-----------------------|-----------------------|-----------------------|-----------------|-----------------------|-----------------------|-----------------------|-----------------------|
| Fried fish or fish sandwich, at home or in a restaurant      | <input type="radio"/> | How much        | <input type="radio"/> | <input type="radio"/> | <input type="radio"/> | <input type="radio"/> |
| Any other fish or shellfish <u>not</u> fried, including tuna | <input type="radio"/> | How much        | <input type="radio"/> | <input type="radio"/> | <input type="radio"/> | <input type="radio"/> |
| Hot dogs, or sausage like Polish, Italian or Chorizo         | <input type="radio"/> | How many        | <input type="radio"/> | <input type="radio"/> | <input type="radio"/> | <input type="radio"/> |
| Bologna, sliced ham, turkey lunch meat, other lunch meat     | <input type="radio"/> | How many slices | <input type="radio"/> | <input type="radio"/> | <input type="radio"/> | <input type="radio"/> |

When you eat lunch meats, are they  Usually low fat  Sometimes  Rarely low-fat  N/A

PLEASE DO NOT WRITE IN THIS AREA

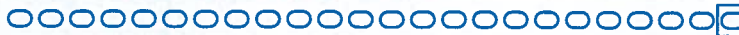

| TYPE OF FOOD                                                        | HOW OFTEN IN THE PAST YEAR                                                                                                           |                               |                       |                              |                       |                       |                             |                             |                       | HOW MUCH EACH TIME<br>SEE PORTION SIZE PICTURES FOR A-B-C-D |                               |                                |                               |                               |
|---------------------------------------------------------------------|--------------------------------------------------------------------------------------------------------------------------------------|-------------------------------|-----------------------|------------------------------|-----------------------|-----------------------|-----------------------------|-----------------------------|-----------------------|-------------------------------------------------------------|-------------------------------|--------------------------------|-------------------------------|-------------------------------|
|                                                                     | NEVER                                                                                                                                | A FEW<br>TIMES<br>per<br>YEAR | ONCE<br>per<br>MONTH  | 2-3<br>TIMES<br>per<br>MONTH | ONCE<br>per<br>WEEK   | TWICE<br>per<br>WEEK  | 3-4<br>TIMES<br>per<br>WEEK | 5-6<br>TIMES<br>per<br>WEEK | EVERY<br>DAY          |                                                             |                               |                                |                               |                               |
| <b>Pasta, breads, spreads, snacks</b>                               |                                                                                                                                      |                               |                       |                              |                       |                       |                             |                             |                       |                                                             |                               |                                |                               |                               |
| Spaghetti, lasagna, or other pasta <u>with</u> tomato sauce         | <input type="radio"/>                                                                                                                | <input type="radio"/>         | <input type="radio"/> | <input type="radio"/>        | <input type="radio"/> | <input type="radio"/> | <input type="radio"/>       | <input type="radio"/>       | <input type="radio"/> | How much                                                    | <input type="radio"/> A       | <input type="radio"/> B        | <input type="radio"/> C       | <input type="radio"/> D       |
| Cheese dishes <u>without</u> tomato sauce, like macaroni and cheese | <input type="radio"/>                                                                                                                | <input type="radio"/>         | <input type="radio"/> | <input type="radio"/>        | <input type="radio"/> | <input type="radio"/> | <input type="radio"/>       | <input type="radio"/>       | <input type="radio"/> | How much                                                    | <input type="radio"/> A       | <input type="radio"/> B        | <input type="radio"/> C       | <input type="radio"/> D       |
| Pizza, including carry-out                                          | <input type="radio"/>                                                                                                                | <input type="radio"/>         | <input type="radio"/> | <input type="radio"/>        | <input type="radio"/> | <input type="radio"/> | <input type="radio"/>       | <input type="radio"/>       | <input type="radio"/> | How many slices                                             | <input type="radio"/> 1       | <input type="radio"/> 2        | <input type="radio"/> 3       | <input type="radio"/> 4       |
| Biscuits, muffins                                                   | <input type="radio"/>                                                                                                                | <input type="radio"/>         | <input type="radio"/> | <input type="radio"/>        | <input type="radio"/> | <input type="radio"/> | <input type="radio"/>       | <input type="radio"/>       | <input type="radio"/> | How many each time                                          | <input type="radio"/> 1       | <input type="radio"/> 2        | <input type="radio"/> 3       | <input type="radio"/> 4       |
| Rolls, hamburger buns, English muffins, bagels                      | <input type="radio"/>                                                                                                                | <input type="radio"/>         | <input type="radio"/> | <input type="radio"/>        | <input type="radio"/> | <input type="radio"/> | <input type="radio"/>       | <input type="radio"/>       | <input type="radio"/> | How many each time                                          | <input type="radio"/> 1/2     | <input type="radio"/> 1        | <input type="radio"/> 2       | <input type="radio"/> 3       |
| White bread or toast, including French, Italian, or in sandwiches   | <input type="radio"/>                                                                                                                | <input type="radio"/>         | <input type="radio"/> | <input type="radio"/>        | <input type="radio"/> | <input type="radio"/> | <input type="radio"/>       | <input type="radio"/>       | <input type="radio"/> | How many slices                                             | <input type="radio"/> 1       | <input type="radio"/> 2        | <input type="radio"/> 3       | <input type="radio"/> 4       |
| Dark bread like rye or whole wheat, including in sandwiches         | <input type="radio"/>                                                                                                                | <input type="radio"/>         | <input type="radio"/> | <input type="radio"/>        | <input type="radio"/> | <input type="radio"/> | <input type="radio"/>       | <input type="radio"/>       | <input type="radio"/> | How many slices                                             | <input type="radio"/> 1       | <input type="radio"/> 2        | <input type="radio"/> 3       | <input type="radio"/> 4       |
| Tortillas                                                           | <input type="radio"/>                                                                                                                | <input type="radio"/>         | <input type="radio"/> | <input type="radio"/>        | <input type="radio"/> | <input type="radio"/> | <input type="radio"/>       | <input type="radio"/>       | <input type="radio"/> | How many each time                                          | <input type="radio"/> 1       | <input type="radio"/> 2        | <input type="radio"/> 3       | <input type="radio"/> 4       |
| Margarine on bread, potatoes or vegetables                          | <input type="radio"/>                                                                                                                | <input type="radio"/>         | <input type="radio"/> | <input type="radio"/>        | <input type="radio"/> | <input type="radio"/> | <input type="radio"/>       | <input type="radio"/>       | <input type="radio"/> | How many pats (Tsp.)                                        | <input type="radio"/> 1       | <input type="radio"/> 2        | <input type="radio"/> 3       | <input type="radio"/> 4       |
| Butter on bread, potatoes or vegetables                             | <input type="radio"/>                                                                                                                | <input type="radio"/>         | <input type="radio"/> | <input type="radio"/>        | <input type="radio"/> | <input type="radio"/> | <input type="radio"/>       | <input type="radio"/>       | <input type="radio"/> | How many pats (Tsp.)                                        | <input type="radio"/> 1       | <input type="radio"/> 2        | <input type="radio"/> 3       | <input type="radio"/> 4       |
| Peanuts or peanut butter                                            | <input type="radio"/>                                                                                                                | <input type="radio"/>         | <input type="radio"/> | <input type="radio"/>        | <input type="radio"/> | <input type="radio"/> | <input type="radio"/>       | <input type="radio"/>       | <input type="radio"/> | How many TBSP.                                              | <input type="radio"/> 1       | <input type="radio"/> 2        | <input type="radio"/> 3       | <input type="radio"/> 4       |
| Snacks like potato chips, corn chips, popcorn (Not pretzels)        | <input type="radio"/>                                                                                                                | <input type="radio"/>         | <input type="radio"/> | <input type="radio"/>        | <input type="radio"/> | <input type="radio"/> | <input type="radio"/>       | <input type="radio"/>       | <input type="radio"/> | How much                                                    | <input type="radio"/> A       | <input type="radio"/> B        | <input type="radio"/> C       | <input type="radio"/> D       |
| Doughnuts, cake, pastry, pie                                        | <input type="radio"/>                                                                                                                | <input type="radio"/>         | <input type="radio"/> | <input type="radio"/>        | <input type="radio"/> | <input type="radio"/> | <input type="radio"/>       | <input type="radio"/>       | <input type="radio"/> | How many pieces                                             | <input type="radio"/> 1       | <input type="radio"/> 2        | <input type="radio"/> 3       | <input type="radio"/> 4       |
| Cookies (Not lowfat)                                                | <input type="radio"/>                                                                                                                | <input type="radio"/>         | <input type="radio"/> | <input type="radio"/>        | <input type="radio"/> | <input type="radio"/> | <input type="radio"/>       | <input type="radio"/>       | <input type="radio"/> | How many                                                    | <input type="radio"/> 1-2     | <input type="radio"/> 3-5      | <input type="radio"/> 6-7     | <input type="radio"/> 8+      |
| Ice cream, frozen yogurt, ice cream bars                            | <input type="radio"/>                                                                                                                | <input type="radio"/>         | <input type="radio"/> | <input type="radio"/>        | <input type="radio"/> | <input type="radio"/> | <input type="radio"/>       | <input type="radio"/>       | <input type="radio"/> | How much                                                    | <input type="radio"/> A       | <input type="radio"/> B        | <input type="radio"/> C       | <input type="radio"/> D       |
| When you eat ice cream or frozen yogurt, is it                      | <input type="radio"/> Usually low-fat <input type="radio"/> Sometimes <input type="radio"/> Rarely low-fat <input type="radio"/> N/A |                               |                       |                              |                       |                       |                             |                             |                       |                                                             |                               |                                |                               |                               |
| Chocolate candy, candy bars                                         | <input type="radio"/>                                                                                                                | <input type="radio"/>         | <input type="radio"/> | <input type="radio"/>        | <input type="radio"/> | <input type="radio"/> | <input type="radio"/>       | <input type="radio"/>       | <input type="radio"/> | How many bars                                               | <input type="radio"/> ① small | <input type="radio"/> ① medium | <input type="radio"/> ① large | <input type="radio"/> ② large |

| TYPE OF BEVERAGE | HOW OFTEN IN THE PAST YEAR |                               |                      |                              |                     |                      |                             |                             |              | HOW MUCH EACH TIME<br>SEE PORTION SIZE PICTURES FOR A-B-C-D |  |  |  |
|------------------|----------------------------|-------------------------------|----------------------|------------------------------|---------------------|----------------------|-----------------------------|-----------------------------|--------------|-------------------------------------------------------------|--|--|--|
|                  | NEVER                      | A FEW<br>TIMES<br>per<br>YEAR | ONCE<br>per<br>MONTH | 2-3<br>TIMES<br>per<br>MONTH | ONCE<br>per<br>WEEK | TWICE<br>per<br>WEEK | 3-4<br>TIMES<br>per<br>WEEK | 5-6<br>TIMES<br>per<br>WEEK | EVERY<br>DAY |                                                             |  |  |  |

**How often do you drink the following beverages?**

|                                                                                                           |                       |                       |                       |                       |                       |                       |                       |                       |                       |                            |                         |                         |                         |                         |
|-----------------------------------------------------------------------------------------------------------|-----------------------|-----------------------|-----------------------|-----------------------|-----------------------|-----------------------|-----------------------|-----------------------|-----------------------|----------------------------|-------------------------|-------------------------|-------------------------|-------------------------|
| Real orange or grapefruit juice, Welch's grape juice, Minute Maid juices, Juicy Juice                     | <input type="radio"/> | How many glasses each time | <input type="radio"/> 1 | <input type="radio"/> 2 | <input type="radio"/> 3 | <input type="radio"/> 4 |
| Hawaiian Punch, Sunny Delight, Hi-C, Tang, or Ocean Spray juices                                          | <input type="radio"/> | How many glasses each time | <input type="radio"/> 1 | <input type="radio"/> 2 | <input type="radio"/> 3 | <input type="radio"/> 4 |
| Kool Aid, Capri Sun or Knudsen juices                                                                     | <input type="radio"/> | How many glasses each time | <input type="radio"/> 1 | <input type="radio"/> 2 | <input type="radio"/> 3 | <input type="radio"/> 4 |
| Instant breakfast milkshakes like Carnation, diet shakes like Slimfast, or liquid supplements like Ensure | <input type="radio"/> | How many glasses or cans   | <input type="radio"/> 1 | <input type="radio"/> 2 | <input type="radio"/> 3 | <input type="radio"/> 4 |
| Glasses of milk (any kind)                                                                                | <input type="radio"/> | How many glasses           | <input type="radio"/> 1 | <input type="radio"/> 2 | <input type="radio"/> 3 | <input type="radio"/> 4 |

When you drink glasses of milk what kind do you usually drink? **MARK ONLY ONE:**

Whole milk                       Non-fat milk                       I don't drink milk or soy milk  
 Reduced fat 2% milk                       Rice milk  
 Low-fat 1% milk                       Soy milk

|                                                                       |                       |                       |                       |                       |                       |                       |                       |                       |                       |                           |                         |                         |                           |                          |
|-----------------------------------------------------------------------|-----------------------|-----------------------|-----------------------|-----------------------|-----------------------|-----------------------|-----------------------|-----------------------|-----------------------|---------------------------|-------------------------|-------------------------|---------------------------|--------------------------|
| Cream, Half-and-Half or non-dairy creamer in coffee or tea            | <input type="radio"/> | Total TBSP. on those days | <input type="radio"/> 1 | <input type="radio"/> 2 | <input type="radio"/> 3-4 | <input type="radio"/> 5+ |
| Regular soft drinks, or bottled drinks like Snapple (Not diet drinks) | <input type="radio"/> | How many bottles or cans  | <input type="radio"/> 1 | <input type="radio"/> 2 | <input type="radio"/> 3-4 | <input type="radio"/> 5+ |
| Beer                                                                  | <input type="radio"/> | How many bottles or cans  | <input type="radio"/> 1 | <input type="radio"/> 2 | <input type="radio"/> 3-4 | <input type="radio"/> 5+ |
| Wine or wine coolers                                                  | <input type="radio"/> | How many glasses          | <input type="radio"/> 1 | <input type="radio"/> 2 | <input type="radio"/> 3-4 | <input type="radio"/> 5+ |
| Liquor or mixed drinks                                                | <input type="radio"/> | How many drinks           | <input type="radio"/> 1 | <input type="radio"/> 2 | <input type="radio"/> 3-4 | <input type="radio"/> 5+ |

Copyright Blokk Dietary Systems  
Berkeley CA



During the past year, have you taken any vitamins or minerals regularly, at least once a month?

- No, not regularly     Yes, fairly regularly →

(IF YES) WHAT DID YOU TAKE FAIRLY REGULARLY?

| VITAMIN TYPE                                                | HOW OFTEN             |                       |                       |                       |                       | FOR HOW MANY YEARS?   |                       |                       |                       |                       |                       |
|-------------------------------------------------------------|-----------------------|-----------------------|-----------------------|-----------------------|-----------------------|-----------------------|-----------------------|-----------------------|-----------------------|-----------------------|-----------------------|
|                                                             | DIDN'T TAKE           | A FEW DAYS per MONTH  | 1-3 DAYS per WEEK     | 4-6 DAYS per WEEK     | EVERY DAY             | LESS THAN 1 YR.       | 1 YEAR                | 2 YEARS               | 3-4 YEARS             | 5-9 YEARS             | 10+ YEARS             |
| <b>Multiple Vitamins.</b> Did you take...                   |                       |                       |                       |                       |                       |                       |                       |                       |                       |                       |                       |
| Regular Once-A-Day, Centrum, or Thera type                  | <input type="radio"/> |
| Stress-tabs or B-Complex type                               | <input type="radio"/> |
| Antioxidant combination type                                | <input type="radio"/> |
| <b>Single Vitamins</b> (not part of multiple vitamins)      |                       |                       |                       |                       |                       |                       |                       |                       |                       |                       |                       |
| Vitamin A (not beta-carotene)                               | <input type="radio"/> |
| Beta-carotene                                               | <input type="radio"/> |
| Vitamin C                                                   | <input type="radio"/> |
| Vitamin E                                                   | <input type="radio"/> |
| Folic acid, folate                                          | <input type="radio"/> |
| Calcium or Tums, alone or combined with vit. D or magnesium | <input type="radio"/> |
| Zinc                                                        | <input type="radio"/> |
| Iron                                                        | <input type="radio"/> |
| Selenium                                                    | <input type="radio"/> |
| Vitamin D, alone or combined with calcium                   | <input type="radio"/> |

If you took vitamin C or vitamin E:

How many milligrams of vitamin C did you usually take, on the days you took it?

- 100     250     500     750     1000     1500     2000     3000+     don't know

How many IUs of vitamin E did you usually take, on the days you took it?

- 100     200     300     400     600     800     1000     2000+     don't know

How often do you use fat or oil in cooking?

- Less than once per week     A few times per week     Once a day     Twice a day     3+ per day

What kinds of fat or oil do you usually use in cooking? MARK ONLY ONE OR TWO

- Don't know, or Pam     Butter/margarine blend     Lard, fatback, bacon fat  
 Stick margarine     Low-fat margarine     Crisco  
 Soft tub margarine     Corn oil, vegetable oil  
 Butter     Olive oil or canola oil

Did you ever drink more beer, wine or liquor than you do now?     Yes     No

Do you smoke cigarettes now?     Yes     No

IF YES, On the average about how many cigarettes a day do you smoke now?

- 1-5     6-14     15-24     25-34     35 or more

What is your ethnic group? (MARK ONE OR MORE)

- Hispanic or Latino     Black or African American     American Indian or Alaska Native  
 White, not Hispanic     Asian     Native Hawaiian or Other Pacific Islander

Thank you very much for filling out this questionnaire. Please take a minute to go back and fill in anything you may have skipped.

PLEASE DO NOT WRITE IN THIS AREA

Copyright Block Dietary Data Systems  
Berkeley, CA  
PH: 510-704-8514

PLEASE DO NOT WRITE IN THIS AREA

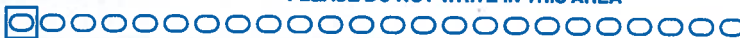

Supplement: NIHMS622685-supplement-BFFQ.pdf [file NIHMS622685-supplement-BFFQ.pdf]
