# Supplementary material
Source: PubMed Central journal article supplement (PMC4145671)
Supplement: NIHMS622685-supplement-01.pdf [file NIHMS622685-supplement-01.pdf]

**Appendix B. Most Commonly Reported Food Items Not Included in BFFQ-Restricted Diaries**

| Food Item      | Percentage (%) of Patients Reporting Item | Food Item               | Percentage (%) of Patients Reporting Item |
|----------------|-------------------------------------------|-------------------------|-------------------------------------------|
| Coffee         | 47                                        | Pancakes                | 6                                         |
| Tea            | 40                                        | Assorted nuts           | 6                                         |
| Crackers       | 33                                        | Gelatin                 | 5                                         |
| Diet soda      | 22                                        | Artificial fruit drinks | 4.8                                       |
| Jam            | 20                                        | Pickled cucumber        | 4.8                                       |
| Sugar          | 18                                        | Pudding                 | 4.8                                       |
| Cornbread      | 16                                        | Cottage cheese          | 4.8                                       |
| Mustard        | 13                                        | Relish                  | 4                                         |
| Hard candy     | 12                                        | Raisins                 | 4                                         |
| Gravy          | 9                                         | BBQ sauce               | 4                                         |
| Salad dressing | 8                                         | Popsicle                | 3                                         |
| Pancake syrup  | 7                                         | Olives                  | 3                                         |
| Mayonnaise     | 7                                         | Pretzels                | 3                                         |
| Lemonade       | 7                                         | Sour cream              | 3                                         |
| Lemon juice    | 7                                         | Hush puppies            | 2.7                                       |

Forty-seven other items that were also not included in the BFFQ-restricted diaries were reported by fewer than 3 (2%) individuals.
